# Supplementary material
Source: bioRxiv or medRxiv preprint supplement (https://www.biorxiv.org/highwire/filestream/13750/field_highwire_adjunct_files/0/050328-1.pdf)
Supplement: Supplementary file [file 050328-1.pdf]

Supplemental Table 1. Strain information and LOS typing results

| Sample ID | Alias    | Source  | Year | Country     | MLST |     | PCR |   |   |   |   |   |   |   |   |    |    |           | LOS locus class | RAST accession number in "guest" account | EMBL accession number |
|-----------|----------|---------|------|-------------|------|-----|-----|---|---|---|---|---|---|---|---|----|----|-----------|-----------------|------------------------------------------|-----------------------|
|           |          |         |      |             | ST   | CC  | 1   | 2 | 3 | 4 | 5 | 6 | 7 | 8 | 9 | 10 | 11 | 12        |                 |                                          |                       |
| 1         | FB457    | Human   | 1997 | Finland     |      |     | 18  | - | - | - | - | - | - | - | - | +  | -  | -         | VIII            |                                          |                       |
| 2         | FB3428   | Human   | 1997 | Finland     |      |     | 18  | - | - | + | - | + | - | - | + | -  | -  | untypable |                 |                                          |                       |
| 3         | FB3508   | Human   | 1997 | Finland     |      |     | 18  | - | - | - | - | - | - | - | - | +  | -  | -         | VIII            |                                          |                       |
| 4         | FB3429   | Human   | 1997 | Finland     | 825  | 828 | 18  | - | - | - | - | - | - | - | - | +  | -  | -         | VIII            | 195.117                                  |                       |
| 5         | FB4856   | Human   | 1997 | Finland     |      |     |     | - | - | + | - | + | + | + | + | -  | -  | untypable |                 |                                          |                       |
| 6         | FB5755   | Human   | 1997 | Finland     | 1563 | 828 | 10  | - | + | + | - | - | - | - | - | -  | -  | II        | 195.118         |                                          |                       |
| 7         | FB6937   | Human   |      |             |      |     | 8   | - | - | + | + | - | - | - | - | -  | -  | untypable |                 |                                          |                       |
| 12        | FB8983   | Human   | 1997 | Finland     | 1628 | 828 | 10  | - | + | + | - | - | - | - | - | -  | -  | II        | 195.91          |                                          |                       |
| 13        | FB8984   | Human   | 1997 | Finland     | 1628 | 828 | 10  | - | + | + | - | - | - | - | - | -  | -  | II        | 195.113         |                                          |                       |
| 14        | FB9468   | Human   | 1997 | Finland     |      |     | 13  | - | - | + | - | + | - | + | - | -  | -  | IV        |                 |                                          |                       |
| 16        | FB10883  | Human   |      |             |      |     | 7   | - | - | - | + | - | - | - | - | -  | -  | III       |                 |                                          |                       |
| 29        | CNET019  | Poultry |      | Netherlands |      |     | 6   | - | - | + | - | + | - | + | - | -  | -  | untypable |                 |                                          |                       |
| 30        | CNET020  | Poultry |      | Netherlands |      |     | 6   | - | - | - | - | - | - | - | - | -  | -  | untypable |                 |                                          |                       |
| 31        | CNET021  | Poultry |      | Netherlands | 901  | 828 | 7   | - | - | - | - | - | - | - | - | -  | -  | untypable | 195.116         |                                          |                       |
| 32        | CNET051  | Human   |      | France      | 838  | 828 | 13  | - | - | + | - | + | + | - | + | -  | -  | IV        |                 |                                          |                       |
| 33        | CNET061  | Poultry |      | Netherlands |      |     | 18  | - | - | - | - | - | - | - | - | +  | -  | VIII      |                 |                                          |                       |
| 34        | CNET062  | Poultry |      | Netherlands | 2183 | 828 | 7   | + | - | - | - | - | - | - | - | -  | -  | I         | 195.107         |                                          |                       |
| 36        | CNET067  | Pig     |      | Netherlands | 1016 | 828 | 10  | - | + | + | - | - | - | - | - | -  | -  | II        | 195.119         |                                          |                       |
| 37        | CNET069  | Pig     |      | UK          | 1240 | UA  | 13  | - | - | + | - | + | + | - | + | -  | -  | IV        |                 |                                          |                       |
| 38        | CNET071  | Pig     |      | Denmark     | 1826 | 828 | 18  | - | - | - | - | - | - | - | - | +  | -  | VIII      | 195.112         |                                          |                       |
| 39        | CNET072  | Pig     |      | Denmark     | 1153 | 828 | 10  | - | + | + | - | - | - | - | - | -  | -  | II        | 195.102         |                                          |                       |
| 41        | CNET082  | Poultry |      | UK          | 825  | 828 | 18  | - | - | - | - | - | - | - | - | +  | -  | VIII      | 195.103         |                                          |                       |
| 44        | FB713    | Human   | 1996 | Finland     | 1156 | 828 | 15  | - | - | + | - | + | + | + | - | -  | -  | VII       |                 |                                          |                       |
| 45        | FB6470   | Human   | 1996 | Finland     | 1946 | 828 | 11  | - | - | - | - | - | - | - | - | -  | -  | X         | 195.106         |                                          |                       |
| 47        | T-72385  | Human   | 2002 | Finland     | 1957 | 828 | 7   | - | - | - | + | - | - | - | - | -  | -  | III       |                 |                                          |                       |
| 49        | 76315    | Human   | 2006 | India       |      |     | 7   | + | - | - | - | - | - | - | - | -  | -  | I         |                 |                                          |                       |
| 50        | 76326    | Human   | 2006 | Romania     | 825  | 828 | 18  | - | - | - | - | - | - | - | - | +  | -  | VIII      | 195.110         |                                          |                       |
| 51        | 76339    | Human   | 2006 | Finland     | 5088 | UA  | 7   | - | - | - | - | - | - | - | - | -  | +  | IX        |                 | HG326877                                 |                       |
| 53        | 76347    | Human   | 2006 | Turkey      |      |     | 7   | - | - | - | - | - | - | - | - | -  | -  | untypable |                 |                                          |                       |
| 54        | 76348    | Human   | 2006 | Spain       |      |     | 7   | + | - | - | - | - | - | - | - | -  | -  | I         |                 |                                          |                       |
| 55        | 76361    | Human   | 2006 | Spain       | 854  | 828 | 10  | - | + | + | - | - | - | - | - | -  | -  | II        | 195.115         |                                          |                       |
| 56        | 76363    | Human   | 2006 | France      |      |     | 12  | + | - | + | - | + | + | - | + | -  | -  | untypable |                 |                                          |                       |
| 58        | 76385    | Human   | 2006 | Finland     | 1614 | 828 | 7   | - | - | - | + | - | - | - | - | -  | -  | III       |                 |                                          |                       |
| 59        | 76398    | Human   | 2006 | Bulgaria    |      |     | 18  | - | - | - | - | - | - | - | - | +  | -  | VIII      |                 |                                          |                       |
| 60        | 76412    | Human   | 2006 | Bulgaria    | 6321 | 828 | 10  | - | + | + | - | - | - | - | - | -  | -  | II        | 195.101         |                                          |                       |
| 61        | 76466    | Human   | 2006 | Finland     | 854  | 828 | 13  | - | - | + | - | + | + | - | + | -  | -  | IV        |                 |                                          |                       |
| 63        | T-73692  | Human   | 2003 | Finland     | 2725 | 828 | 11  | - | - | - | - | - | - | - | - | -  | -  | X         | 195.105         |                                          |                       |
| 62        | 76656    | Human   | 2006 | Finland     | 1965 | 828 | 11  | - | - | - | - | - | - | - | - | -  | -  | X         |                 |                                          |                       |
| 64        | T-73805  | Human   | 2003 | Finland     | 1968 | UA  | 7   | - | - | - | + | - | - | - | - | -  | -  | III       |                 |                                          |                       |
| 65        | T-73864  | Human   | 2003 | Finland     | 1585 | 828 | 10  | - | + | + | - | - | - | - | - | -  | -  | II        | 195.97          |                                          |                       |
| 66        | 8045     | Human   |      | Finland     |      |     | 18  | - | - | - | - | - | - | - | - | +  | -  | VIII      |                 |                                          |                       |
| 67        | 03VV415  | Human   |      | Finland     | 5672 | 828 | 10  | - | + | + | - | - | - | - | - | -  | -  | II        |                 |                                          |                       |
| 68        | 03VV2801 | Human   |      | Finland     |      |     | 18  | - | - | - | - | - | - | - | - | +  | -  | VIII      |                 |                                          |                       |
| 70        | HKY6592  | Poultry | 2003 | Finland     | 854  | 828 | 13  | - | - | + | - | + | - | - | + | -  | -  | IV        |                 |                                          |                       |



|     |        |     |      |         |      |     |    |   |   |   |   |   |   |   |   |   |   |   |           |  |               |
|-----|--------|-----|------|---------|------|-----|----|---|---|---|---|---|---|---|---|---|---|---|-----------|--|---------------|
| 133 | E71.3  | Pig | 2009 | Finland |      |     | 7  | - | - | - | + | - | - | - | - | - | - | - | III       |  |               |
| 134 | E75.1  | Pig | 2009 | Finland |      |     | 12 | - | - | + | - | + | + | - | + | - | - | - | untypable |  |               |
| 135 | E82.3  | Pig | 2009 | Finland |      |     | 7  | - | - | - | + | - | - | - | - | - | - | - | III       |  |               |
| 136 | E89.3  | Pig | 2009 | Finland |      |     | 13 | - | - | + | - | + | - | - | - | - | - | - | untypable |  |               |
| 137 | E90.1  | Pig | 2009 | Finland | 2172 | 828 | 10 | - | + | + | - | - | - | - | - | - | - | - | II        |  | 195.125       |
| 138 | E107.3 | Pig | 2009 | Finland | 1145 | 828 | 11 | - | - | - | - | - | + | - | - | - | - | + | XI        |  | 195.111       |
| 140 | E97.3  | Pig | 2009 | Finland |      |     | 11 | - | - | - | - | - | - | - | - | - | - | + | X         |  |               |
| 141 | E116.3 | Pig | 2009 | Finland |      |     | 13 | - | - | + | - | + | - | - | - | - | - | - | VI        |  |               |
| 142 | E125.3 | Pig | 2009 | Finland |      |     | 7  | - | - | - | + | - | - | - | - | - | - | - | III       |  |               |
| 143 | E128.3 | Pig | 2009 | Finland |      |     | 13 | - | - | + | - | + | - | - | + | - | - | - | IV        |  |               |
| 144 | E141.3 | Pig | 2009 | Finland |      |     | 10 | - | + | + | - | - | - | - | - | - | - | - | II        |  |               |
| 145 | E144.3 | Pig | 2009 | Finland |      |     | 15 | - | - | + | - | + | - | + | + | - | - | - | VII       |  |               |
| 147 | E149.3 | Pig | 2009 | Finland |      |     | 14 | - | - | + | - | + | - | + | + | - | - | - | untypable |  |               |
| 148 | E150.1 | Pig | 2009 | Finland | 7799 | 828 | 13 | - | - | + | - | + | - | - | + | - | - | - | IV        |  | 195.129       |
| 149 | E154.3 | Pig | 2009 | Finland | 1058 | 828 | 11 | - | - | - | - | - | - | - | - | - | - | + | X         |  | 195.130       |
| 150 | E160.3 | Pig | 2009 | Finland |      |     | 13 | - | - | + | - | + | - | - | + | - | - | - | IV        |  |               |
| 151 | E163.2 | Pig | 2009 | Finland | 1096 | 828 | 10 | - | + | + | - | - | - | - | - | - | - | - | II        |  | 195.126       |
| 152 | E175.9 | Pig | 2009 | Finland |      |     | 13 | - | - | + | - | + | - | - | + | - | - | - | IV        |  |               |
| 153 | A28    | Pig | 2007 | Finland |      |     | 12 | - | - | - | - | - | - | - | - | - | - | - | X         |  | 6666666.94320 |
| 154 | A30    | Pig | 2007 | Finland |      |     | 7  | - | - | - | + | - | - | - | - | - | - | - | III       |  |               |
| 155 | A31    | Pig | 2007 | Finland |      |     | 7  | - | - | - | + | - | - | - | - | - | - | - | III       |  |               |
| 156 | A32    | Pig | 2007 | Finland |      |     | 7  | - | - | - | + | - | - | - | - | - | - | - | III       |  |               |
| 157 | A40.1  | Pig | 2007 | Finland |      |     | 7  | - | - | - | + | - | - | - | - | - | - | - | III       |  |               |
| 158 | A46    | Pig | 2007 | Finland |      |     | 7  | - | - | - | + | - | - | - | - | - | - | - | III       |  |               |
| 159 | A50    | Pig | 2007 | Finland |      |     | 11 | - | - | - | - | - | - | - | - | - | - | + | X         |  |               |
| 160 | A53    | Pig | 2007 | Finland |      |     | 11 | - | - | - | - | - | - | - | - | - | - | + | X         |  |               |
| 161 | A56    | Pig | 2007 | Finland |      |     | 11 | - | - | - | - | - | - | - | - | - | - | + | untypable |  |               |
| 162 | A57    | Pig | 2007 | Finland |      |     | 13 | - | - | + | - | + | - | - | - | - | - | - | VI        |  |               |
| 163 | A62    | Pig | 2007 | Finland |      |     | 11 | - | - | - | - | - | - | - | - | - | - | + | X         |  |               |
| 164 | A66    | Pig | 2007 | Finland |      |     | 11 | - | - | - | - | - | - | - | - | - | - | + | X         |  |               |
| 165 | A68    | Pig | 2007 | Finland |      |     | 11 | - | - | - | - | - | - | - | - | - | - | + | X         |  |               |
| 167 | A70.1  | Pig | 2007 | Finland |      |     | 10 | - | + | + | - | - | - | - | - | - | - | - | II        |  |               |
| 168 | A71.1  | Pig | 2007 | Finland |      |     | 13 | - | - | + | - | + | - | - | - | - | - | - | VI        |  |               |
| 169 | A74.1  | Pig | 2007 | Finland |      |     | 13 | - | - | + | - | + | - | - | - | - | - | - | VI        |  |               |
| 170 | A78.1  | Pig | 2007 | Finland |      |     | 10 | - | + | + | - | - | - | - | - | - | - | - | II        |  |               |
| 174 | A26.1  | Pig | 2007 | Finland | 6956 |     | 13 | - | - | + | - | + | - | - | - | - | - | - | VI        |  | 195.109       |
| 175 | A30.1  | Pig | 2007 | Finland |      |     | 11 | - | - | - | - | - | - | - | - | - | - | + | X         |  |               |
| 176 | A32.1  | Pig | 2007 | Finland |      |     | 11 | - | - | - | - | - | - | - | - | - | - | + | X         |  |               |
| 177 | A35.1  | Pig | 2007 | Finland | 1143 |     | 13 | - | - | + | - | + | + | - | + | - | - | - | IV        |  | 195.108       |
| 178 | A37.1  | Pig | 2007 | Finland |      |     | 11 | - | - | - | - | - | - | - | - | - | - | + | X         |  |               |
| 179 | C1.1   | Pig | 2008 | Finland |      |     | 7  | - | - | - | + | - | - | - | - | - | - | - | III       |  |               |
| 183 | C23.1  | Pig | 2008 | Finland |      |     | 13 | - | - | + | - | + | - | - | + | - | - | - | IV        |  |               |
| 184 | C25.1  | Pig | 2008 | Finland |      |     | 10 | - | + | + | - | - | - | - | - | - | - | - | II        |  |               |
| 185 | C28.3  | Pig | 2008 | Finland |      |     | 7  | - | - | + | + | - | - | - | - | - | - | + | untypable |  |               |
| 186 | C29.1  | Pig | 2008 | Finland |      |     | 11 | - | - | - | - | - | - | - | - | - | - | + | X         |  |               |
| 188 | C34.2  | Pig | 2008 | Finland |      |     | 13 | - | - | + | - | + | - | - | - | - | - | - | VI        |  |               |
| 189 | C35.1  | Pig | 2008 | Finland |      |     | 11 | - | - | - | - | - | - | - | - | - | - | + | X         |  |               |
| 190 | C37.1  | Pig | 2008 | Finland |      |     | 13 | - | - | + | - | + | - | - | + | - | - | - | IV        |  |               |

|     |       |     |      |         |  |    |   |   |   |   |   |   |   |   |   |   |   |   |     |  |  |
|-----|-------|-----|------|---------|--|----|---|---|---|---|---|---|---|---|---|---|---|---|-----|--|--|
| 191 | C39.1 | Pig | 2008 | Finland |  | 7  | - | - | - | + | - | - | - | - | - | - | - | - | III |  |  |
| 193 | C40.3 | Pig | 2008 | Finland |  | 13 | - | - | + |   | + | - | - | - | - | - | - | - | VI  |  |  |
| 195 | C46.1 | Pig | 2008 | Finland |  | 7  | - | - | - | + | - | - | - | - | - | - | - | - | III |  |  |
| 196 | C48.1 | Pig | 2008 | Finland |  | 13 | - | - | + | - | + | - | - | + | - | - | - | - | IV  |  |  |
